34 some other relatively large producers. Most of the production in sub-Saharan Africa is by  
35 smallholder farmers in marginal conditions, often as an intercrop with maize, sorghum, or millet  
36 (Ehlers and Hall, 1997). Due to its high adaptability to both heat and drought and its association  
37 with nitrogen fixing bacteria, cowpea is a versatile crop (Ehlers and Hall, 1997; Boukar et al.,  
38 2018).

39 The most common form of consumption is as dry grain. The seeds are used whole or  
40 ground into flour (Singh, 2014; Tijjani et al., 2015). Seed coat pattern is an important consumer-  
41 related trait in cowpea. Consumers make decisions about the quality and presumed taste of a  
42 product based on appearance (Jaeger et al., 2018; Kostyla et al., 1978). Cowpea displays a variety  
43 of patterns, including varied eye shapes and sizes, Holstein, Watson, and Full Coat pigmentation,  
44 among others (Figure 1). Each cowpea production region has preferred varieties, valuing certain  
45 color and pattern traits above others for determining quality and use. In West Africa consumers  
46 pay a premium for seeds exhibiting certain characteristics specific to the locality, such as lack of  
47 color for use as flour or solid brown for use as whole beans (Herniter et al., 2019; Langyintuo et  
48 al., 2003; Mishili et al., 2009). In the United States consumers prefer varieties with tight black  
49 eyes, commonly referred to as “black-eyed peas” (Fery, 1985).

50 Seed coat traits in cowpea have been studied since the early 20th century, when Spillman  
51 (1911) and Harland (1919), reviewed by Fery (1980), explored the inheritance of factors  
52 controlling seed coat color and pattern. In a series of F<sub>2</sub> populations Spillman (1911) and  
53 Harland (1919) identified genetic factors responsible for color expression, including “*Color*  
54 *Factor*” (*C*), “*Watson*” (*W*), “*Holstein-1*” (*H-1*), and “*Holstein-2*” (*H-2*). A three-locus system  
55 controlling seed coat pattern was established by Spillman and Sando (1930) and was confirmed  
56 by Saunders (1960) and Drabo et al. (1988), though “*O*” was used in place of “*C*.”

57 A genotyping array for 51,128 single nucleotide polymorphisms (SNP) was recently  
58 developed for cowpea (Muñoz-Amatriaín et al., 2017) which offers opportunities to improve the  
59 precision of genetic mapping. Numerous biparental populations have been used to map major  
60 quantitative trait loci (QTL) for various traits, including root-knot nematode resistance (Santos et  
61 al., 2016), domestication-related traits (Lo et al., 2018), and black seed coat color (Herniter et al.,  
62 2018) and to develop consensus genetic maps of cowpea (Lucas et al., 2011; Muchero et al.,  
63 2009; Muñoz-Amatriaín et al., 2017). In addition, new populations have been developed for  
64 higher-resolution mapping including an eight-parent Multi-parent Advanced Generation Inter-  
65 Cross (MAGIC) population containing 305 lines (Huynh et al., 2018). A reference genome  
66 sequence of cowpea (Lonardi et al., 2019; phytozome.net) and genome assemblies of six  
67 additional diverse accessions (Muñoz-Amatriaín et al., 2019) have been produced recently. Here,  
68 we make use of these resources to map a variety of seed coat pattern traits, determine candidate  
69 genes, and develop a model for genetic control of seed coat pattern. Additionally, we posit a  
70 developmental pattern for the cowpea seed coat to explain some of the observed variation.

## 71 **2 Materials and Methods**

## 72 **2.1 Plant Materials**

73 Ten populations were used for mapping: an eight-parent MAGIC population containing  
74 305 lines (Huynh et al., 2018), four biparental recombinant inbred line (RIL) populations, and  
75 five F2 populations. Descriptions of each pattern discussed below can be found in Section 2.3  
76 and examples can be seen in Figure 1.

77 One biparental population consisted of 87 RILs developed at the University of California,  
78 Riverside (UCR), derived from a cross between California Blackeye 27 (CB27), which has a  
79 black Eye 2 pattern, and IT82E-18, also known as “Big Buff” (BB), which has a brown Full Coat  
80 pattern (Muchero et al., 2009). The second biparental RIL population consisted of 80 RILs  
81 developed at UCR derived from a cross between CB27 and IT97K-556-6 (556), which has a  
82 brown Full Coat pattern (Huynh et al., 2015). The third biparental RIL population consisted of  
83 101 RILs developed at UCR, derived from a cross between California Blackeye 46 (CB46),  
84 which has a black Eye 2 pattern, and IT93K-503-1 (503), which has a brown Eye 1 pattern  
85 (Pottorff et al., 2014). The fourth biparental RIL population consisted of 76 RILs developed at  
86 UCR and at the International Institute for Tropical Agriculture in Nigeria, derived from a cross  
87 between 524B, which has a black Eye 2 pattern, and IT84S-2049 (2049), which has a brown Eye  
88 1 pattern (Menéndez et al., 1997). The F2 populations were developed at UCR as part of this  
89 work. Two F2 populations, consisting of 176 and 132 individuals, were developed from  
90 independent crosses between CB27 and Bambey 21 (B21), which has the No Color phenotype.  
91 One F2 population, consisting of 143 individuals, was developed from a cross between B21 and  
92 California Blackeye 50 (CB50), which has a black Eye 2 pattern. Two F2 populations, consisting  
93 of 175 and 119 individuals, were developed from independent crosses between Tvu-15426,  
94 which has a purple Full Coat pattern, and MAGIC014, a line developed as part of the MAGIC  
95 population but not included in the final population, which has a black Watson pattern.

96 To temporally describe seed coat development four accessions were examined: CB27,  
97 MAGIC059, Sanzi, and Sasaque. CB27 is described above. MAGIC059 has the Starry Night  
98 pattern in black and purple and is one of the lines included in the MAGIC population. Sanzi has  
99 a Speckled pattern in black and purple. Sasaque has the Full Coat pattern in red and purple.

## 100 **2.2 SNP genotyping and data curation**

101 DNA was extracted from young leaf tissue using the Qiagen DNeasy Plant Mini Kit  
102 (Qiagen, Germany). A total of 51,128 SNPs were assayed in each sample using the Illumina  
103 Cowpea iSelect Consortium Array (Illumina Inc., California, USA; Muñoz-Amatriaín et al.,  
104 2017). Genotyping was performed at the University of Southern California Molecular Genomics  
105 Core facility (Los Angeles, California, USA). The same custom cluster file as in Muñoz-  
106 Amatriaín et al. (2017) was used for SNP calling. In the F2 populations the extracted DNA was  
107 bulked by phenotype, with DNA from 20 individuals combined in each genotyped sample.

108 For the MAGIC population, SNP data and a genetic map were available from Huynh et  
109 al. (2018). The map included 32,130 SNPs in 1,568 genetic bins (Huynh et al., 2018). For the  
110 biparental RIL populations, SNP data and genetic maps for the CB27 by BB and the CB46 by  
111 503 populations were available from Muñoz-Amatriaín et al. (2017), and SNP data and a genetic  
112 map were available for the 524B by 2049 population from Santos et al. (2018). The CB27 by 556  
113 genetic map was created using MSTMap (Wu et al., 2008). The CB27 by BB genetic map  
114 included 16,566 polymorphic SNPs in 977 genetic bins (Muñoz-Amatriaín et al., 2017); the  
115 CB27 by 556 genetic map contained 16,284 SNPs in 2604 bins; the CB46 by 503 genetic map  
116 contained 16,578 SNPs in 683 bins (Muñoz-Amatriaín et al., 2017); the 524B by 2049 genetic  
117 map contained 14,202 SNPs in 933 bins (Santos et al., 2018). For each F2 population, SNPs  
118 were filtered to remove non-polymorphic loci between the respective parents. The number of  
119 markers used for each population is as follows: the two CB27 by B21 populations, 8,550 SNPs  
120 (Supplementary Table 1); the B21 by CB50 population, 8,628 SNPs (Supplementary Table 2);  
121 the two Tvu-15426 by MAGIC014 populations, 20,010 SNPs (Supplementary Table 3).

### 122 **2.3 Seed coat phenotyping**

123 Phenotype data for seed coat traits were collected by visual examination of the seeds. The  
124 scored phenotypic classes consisted of No Color, Eye 1, Eye 2, Holstein, Watson, and Full Coat  
125 (Figure 1). No Color indicates no pigmentation present on the seed coat. Eye 1 consists of a  
126 loose eye in the shape of a teardrop with spots of color outside the eye on the wider side. Eye 2  
127 consists of a tight eye in the shape of two wings with no pigment observed outside the edge of  
128 the eye. Holstein consists of an eye with a defined edge and additional spots of pigmentation  
129 spread over the seed coat up to almost completely covering the coat. Watson consists of an eye  
130 with an indefinite edge. Full Coat consists of pigment completely covering the seed coat. Two of  
131 the lines used for observing seed coat development had other seed coat patterns than those  
132 mapped. MAGIC014 had the Starry Night pattern, which consists of incomplete pigmentation  
133 covering the entire seed. Sanzi had the Speckled pattern, which consists of small dots of pigment  
134 covering the seed coat. Seeds with a paler brown color are often difficult to distinguish between  
135 the Eye 1 and Watson patterns. The MAGIC population was scored for Eye 1, Eye 2, Holstein,  
136 Watson, and Full Coat patterns (Supplementary Table 4). The CB27 by BB (Supplementary  
137 Table 5) and CB27 by 556 (Supplementary Table 6) biparental RIL populations were scored for  
138 Eye 2, Holstein, Watson, and Full Coat patterns. The CB46 by 503 (Supplementary Table 7) and  
139 524B by 2049 (Supplementary Table 8) biparental RIL populations were scored for Eye 1, Eye  
140 2, Holstein, Watson, and Full Coat patterns. The CB27 by B21 and B21 by CB50 F2 populations  
141 were scored for the No Color and Eye 2 patterns. The Tvu-15426 by MAGIC014 F2 populations  
142 were scored for the Watson and Full coat patterns.

143 For mapping purposes, each observed pattern was scored individually and mapped  
144 independently with scores assigned as “1” indicating presence of the trait and a “0” indicating  
145 absence. For example, a line expressing the Eye 1 pattern would be scored as “1” for the Eye 1  
146 trait and “0” for all other traits. Pattern phenotypes are mutually exclusive. As the Eye 1 pattern

147 appears to be epistatic towards the *H* and *W* loci, any lines with the Eye 1 phenotype were scored  
148 as missing data for other seed coat phenotypes to avoid biasing the mapping. This was the case in  
149 all populations other than the MAGIC population, as the mpMap script could not operate with  
150 such an extent of missing data. In the MAGIC population, for traits other than Eye 1 (Eye 2,  
151 Holstein, Watson, and Full Coat), individuals with the Eye 1 phenotype were scored as “0”  
152 instead of as missing data since marking too many lines as missing data caused r/mpMap to fail.

## 153 **2.4 Segregation Ratios**

154 Expected segregation ratios reported in Table 2 were determined based on the type of  
155 population, parental and F1 phenotypes. For example, the F2 populations were expected to  
156 segregate in a 3:1 ratio for traits controlled by single genes with complete dominant/recessive  
157 relationships, while the biparental RIL populations were expected to segregate in a 1:1 ratio.  
158 Expected segregation ratios were tested by chi-square analysis.

159 For the MAGIC population, based on how the population was constructed (Huynh et al.,  
160 2018) it was assumed that each fully homozygous parent had a roughly 1/8 probability to pass its  
161 genotype at a particular locus to a given RIL. For example, at the *C* locus, three parents (IT84S-  
162 2049, IT89KD-288, and IT93K-503-1) express the Eye 1 phenotype and are proposed to have a  
163  $C_1C_1$  genotype, while the other five parents are proposed to have a  $C_2C_2$  genotype. Based on this,  
164 a given line in the population is expected to have a 3/8 probability of having a  $C_1C_1$  genotype  
165 and a 5/8 probability of have a  $C_2C_2$  genotype. At the *W* and *H* loci, one parent (CB27) is  
166 proposed to have the  $H_0H_0$  and  $W_0W_0$  genotypes, while the other seven parents are proposed to  
167 have the  $W_1W_1$  and  $H_1H_1$  genotypes. Based on this, a line should have a 1/8 probability of having  
168 the  $W_0W_0$  and a 1/8 probability of having the  $H_0H_0$  genotype. By multiplying the probabilities at  
169 each locus, the probability of a given genotype can be determined using the following equation:

$$170 \quad P_C * P_W * P_H = P_{net}$$

171 Where  $P_C$  is the probability of a given allele at the *C* locus,  $P_W$  is the probability of a  
172 given allele at the *W* locus,  $P_H$  is the probability of a given allele at the *H* locus, and  $P_{net}$  is the  
173 probability of a given genotype. For example, the probability of a  $C_2C_2H_1H_1W_0W_0$  genotype,  
174 which would have a Holstein phenotype would be 35/512 ( $[5/8]*[7/8]*[1/8]$ ). The above method  
175 results in a predicted 192:5:35:35:245 phenotypic ratio for the Eye 1 ( $C_1C_1$ ), Eye 2  
176 ( $C_2C_2H_0H_0W_0W_0$ ), Holstein ( $C_2C_2H_1H_1W_0W_0$ ), Watson ( $C_2C_2H_0H_0W_1W_1$ ), and Full Coat  
177 ( $C_2C_2H_1H_1W_1W_1$ ) patterns, respectively.

## 178 **2.5 Trait mapping**

179 Trait mapping was achieved with different methods for each type of population. In the  
180 MAGIC population, the R package “mpMap” (Huang and George, 2011) was used as described  
181 by Huynh et al. (2018). The significance cutoff values were determined through 1000  
182 permutations, resulting in a threshold of  $p = 8.10E-05$  [ $-\log_{10}(p) = 4.09$ ]. Due to the high  
183 number of markers in the genotype data, imputed markers spaced at 1 cM intervals were used.

184 In the biparental RIL populations, the R packages “qtl” (Broman et al., 2003) and “snow”  
185 (Tierney et al., 2015) were used as in Herniter et al. (2018). Briefly, probability values were  
186 assigned to each SNP using a Haley-Knott regression, tested for significance with 1000  
187 permutations, and marker effects were determined using a hidden Markov model.

188 For the F2 populations, the genotype calls of each bulked DNA pool in the population  
189 were filtered to leave only the markers known to be polymorphic between the parents, and these  
190 were then sorted based on physical positions in the pseudochromosomes available from  
191 Phytozome (Lonardi et al. 2019; phytozome.net). Each population’s genotype was then  
192 examined visually in Microsoft Excel for areas where the recessive bulk was homozygous, and  
193 the dominant bulk was heterozygous. Duplicated populations were examined in conjunction.

## 194 **2.6 Determining haplotype blocks**

195 Once significant regions were established through mapping analysis, the overlapping area  
196 shared between the four biparental RIL populations was examined to determine the minimal area  
197 where all four biparental populations had overlapping haplotype blocks. SNPs located in the  
198 hotspots of pseudochromosomes Vu07, Vu09, and Vu10 were examined visually in Microsoft  
199 Excel for regions of identity within phenotypic groups. SNPs located in the hotspots which had  
200 been removed during trait mapping due to high levels of missing data were added back as  
201 presence/absence variations and segregated similar to nucleotide polymorphisms.

## 202 **2.7 Determining candidate genes**

203 Genes were examined within each minimal haplotype block. Gene expression data (Yao  
204 et al., 2016), from the cowpea reference genome (IT97K-499-35), which has a black Eye 1  
205 ( $C_1C_1$ ) pattern available from the Legume Information System (legumeinfo.org) were examined  
206 for expression in developing seed tissue. Genes encoding proteins known to be involved in  
207 regulation of the flavonoid biosynthesis pathway were prioritized.

## 208 **2.8 Determining allelic series**

209 Dominance relationships were determined by examining the phenotypes of several F1  
210 progeny in addition to segregation ratios in the F2 populations. Crosses were made between  
211 CB27 and three lines from the CB27 by BB population (BB-090, BB-113, and BB-074). Seeds  
212 from these F1 plants were visually examined for seed coat patterns. CB27/BB-090 seeds had a  
213 Watson pattern ( $C_2C_2H_0H_0W_1W_1$ ), CB27/BB-113 seeds had a Holstein pattern ( $C_2C_2H_1H_1W_0W_0$ ),  
214 and CB27/BB-074 seeds had a Full Coat pattern ( $C_2C_2H_1H_1W_1W_1$ ). An additional cross was  
215 available from the early development of the MAGIC population, where the phenotype of the  
216 seed coat on seeds from a maternal  $C_1C_2$  heterozygote was Full Coat. IT84S-2246 (Full Coat,  
217  $C_2C_2H_1H_1W_1W_1$ ) was crossed with IT93K-503-1 (Eye 1,  $C_1C_1H_1H_1W_1W_1$ ) to yield this  
218  $C_2C_1H_1H_1W_1W_1$  maternal parent.

## 219 **2.9 Comparing sequence variation**

220 The genome sequences of the candidate genes from each of five genome sequences (the  
221 reference genome sequence and four additional genome assemblies) and about 3 kb of upstream  
222 sequence were compared using A plasmid Editor (ApE;  
223 [jorgensen.biology.utah.edu/wayned/ape/](http://jorgensen.biology.utah.edu/wayned/ape/)). Transcription factor binding sites were predicted in the  
224 upstream regulatory region of each gene using the binding site prediction function available from  
225 the Plant Transcription Factor Database (Jin et al., 2017; [plantfdb.cbi.pku.edu.cn/](http://plantfdb.cbi.pku.edu.cn/)). The species  
226 input was *Vigna radiata* (mung bean), as a map of cowpea was unavailable. The cowpea  
227 reference sequence is of IT97K-499-35. Among the additional sequenced genomes, CB5-2 has  
228 the Eye 2 pattern ( $C_2C_2$ ), Suvita-2 has the Full Coat pattern ( $C_2C_2H_1H_1W_1W_1$ ), Sanzi has a  
229 Speckled pattern, and UCR779 has the Full Coat pattern ( $C_2C_2H_1H_1W_1W_1$ ). See Section 2.3 for  
230 pattern descriptions and Figure 1 for examples.

231 A larger set of SNPs (about 1 million), discovered from whole-genome shotgun  
232 sequencing of 37 diverse accessions (Muñoz-Amatriaín et al., 2017; Lonardi et al. 2019)), was  
233 available from Phytozome ([phytozome.net](http://phytozome.net)). Among the 37 accessions, 28 had phenotype data  
234 available. These lines were examined for variations in the SNP selection panel that were in the  
235 gene-coding and regulatory regions of the candidate genes.

## 236 **2.10 Correlation test**

237 The 28 lines from the SNP selection panel with phenotype and genotype data available  
238 were tested for correlation in R, using the native “cor.test” function. For input, the phenotype  
239 was recorded as “+1” for accessions with the Eye 1 ( $C_1C_1$ ) phenotype and “-1” for those without.  
240 The genotype was recorded as “+1” for accessions matching the reference genotype, “-1” for the  
241 alternate homozygote, and “0” for the heterozygote (Supplementary Table 9).

## 242 **2.11 Seed color development**

243 The four accessions for which pattern development was recorded (CB27, MAGIC059,  
244 Sanzi, and Sasaque) were grown in a greenhouse at the University of California, Riverside  
245 (Riverside, California; 33.97° N 117.32° W) at a constant temperature of about 32°C from March  
246 through May 2018. Three plants were used for each accession. Upon flowering, each flower was  
247 tagged with the date it opened. The flowers were permitted to self-fertilize. For each day after the  
248 flower opened, beginning on the second day, on each of the three test plants a pod was collected  
249 until no more green pods were observed.

250 Seeds from each collected pod were photographed using a Canon EOS Rebel T6i at a 90°  
251 angle under consistent lighting conditions. The length of the most advanced seed within the pod  
252 was measured using ImageJ ([imagej.nih.gov](http://imagej.nih.gov)). A developmental scale from 0 to 5 was designed  
253 based on the visual observations of the spread of pigmentation (see Results). Each photograph  
254 was scored using this scale.

## 255 **3 Results**

### 256 3.1 Phenotypic data and segregation ratios

257 Phenotypic data and proposed genotypes for each parent in the observed populations can  
258 be found in Table 1. A summary of the phenotypic data, along with predicted segregation ratios,  
259 chi-square values, and probability can be found in Table 2.

### 260 3.2 Identification of loci controlling seed coat pattern

261 A total of 35 SNP loci were identified using different methods for each population type  
262 (see Materials and Methods for details) and were concentrated on three chromosomes: Vu07 (*C*  
263 locus), Vu09 (*H* locus), and Vu10 (*W* locus). Mapping results can be found in Supplementary  
264 Table 10. The overlapping mapping results allowed a narrowing of the area examined for  
265 candidate genes.

### 266 3.3 Determination of minimal haplotype blocks

267 Following trait mapping, all called SNPs on chromosomes Vu07, Vu09, and Vu10 were  
268 examined for minimal haplotype blocks in the overlapping significant regions in the four  
269 biparental RIL populations. On Vu07 (*C* locus) the minimal haplotype block was between  
270 2\_12939 and 2\_09638 (228,331 bp) and contained ten genes. On Vu09 the minimal haplotype  
271 block was between 2\_33224 and 2\_12692 (166,724 bp) and contained seventeen genes. On Vu10  
272 the minimal haplotype block was between 2\_12467 and 2\_15325 (120,513 bp) and contained  
273 eleven genes. The list of candidate genes can be found in Supplementary Table 11 and on  
274 Phytozome (Lonardi et al. 2019; phytozome.org) The minimal haplotype block regions can be  
275 found in Supplementary Table 12.

### 276 3.4 Identification of candidate genes

277 A predominant candidate gene was identified at each locus based on high relative  
278 expression in the developing seeds (Supplementary Figure 1) and a review of the literature on the  
279 regulation of the flavonoid biosynthesis pathway (see Discussion for details). This led to the  
280 determination of a single major candidate gene on each of Vu07, Vu09, and Vu10. Each of the  
281 candidate genes belongs to a class which is known to be involved in transcriptional control of the  
282 later stages of flavonoid biosynthesis. No Color, Eye 1, and Full Coat mapped to an overlapping  
283 area on Vu07, where the gene *Vigun07g110700*, encoding a basic helix-loop-helix protein, was  
284 noted as a strong candidate gene. Eye 2, Holstein, Watson, and Full Coat mapped to a similar  
285 area on Vu09, where the gene *Vigun09g139900*, encoding a WD-repeat gene, was noted as a  
286 strong candidate gene. Eye 1, Eye 2, Holstein, Watson, and Full Coat mapped to an overlapping  
287 area on Vu10, where the gene *Vigun10g163900*, encoding an E3 ubiquitin ligase protein with a  
288 zinc finger, was noted as a strong candidate gene.

### 289 3.5 Determination of allelic series

290 Segregation ratios indicated the dominance of  $H_1$  over  $H_0$  (*Holstein* locus, Figure 2E, Gii),  $W_1$   
291 over  $W_0$  (*Watson* locus, Figure 2Gi),  $C_2$  over  $C_0$  (*Color Factor* locus, Figure 2F), and  $C_2$  over  $C_1$



292 (*Color Factor* locus, Figure 2Giv). The dominance relationship between the  $C_1$  and  $C_0$  alleles  
293 could not be determined from these data.

### 294 **3.6 Sequence comparisons of candidate genes**

295 Multiple sequence alignments for each of the three candidate genes and regulatory  
296 regions (~3 kb upstream of the transcription start site) revealed SNPs and small insertions or  
297 deletions (Supplementary Datasets 1, 2, and 3). None of the variants in the transcript sequence  
298 were predicted to cause changes in the amino acid sequence.

299 The regulatory region of *Vigun07g110700* (*C* locus candidate gene) showed a C/T SNP  
300 variation between the reference genome and the four other genome sequences on Vu07 at  
301 20,544,306 bp. The reference genome has a T at this position while the other four sequences  
302 have a C. Transcription factor binding site prediction from the Plant Transcription Factor  
303 Database ([plantfdb.cbi.pku.edu.cn/](http://plantfdb.cbi.pku.edu.cn/)) indicated that this variation constitutes either a WRKY  
304 binding site in the C allele or an ERF binding site in the T allele. Of the 28 accessions in the SNP  
305 selection panel, eleven expressed the Eye 1 ( $C_1$ ) pattern and 17 did not. Twenty accessions had a  
306 CC genotype, six had a TT genotype, and two had a TC genotype. The correlation test gave an  
307 estimated correlation value of 0.75, with a  $p$ -value of 3.51E-06, indicating significant correlation  
308 between the genotype and phenotype values such that this SNP is a reliable marker for  
309 distinguishing between the  $C_1$  (Eye 1) and the  $C_2$  (Eye 2) alleles. Two of the 28 lines had the No  
310 Color ( $C_0$ ) phenotype, but had the CC genotype, indicating that this SNP is not a good marker for  
311 the  $C_0$  allele (for a possible explanation see Discussion). The regulatory region of  
312 *Vigun09g139900* (*W* locus candidate gene) showed a C/T variation between the reference  
313 genome and CB5-2 against the other three genome sequences on Vu09 at 30,207,722 bp. This  
314 SNP was not included in the list from the SNP selection panel and so could not be examined like  
315 the previous SNP. Transcription factor binding site prediction did not indicate that the site was a  
316 target for any transcription factor in either form. The upstream regulatory region of  
317 *Vigun10g163900* (*H* locus candidate gene) did not have any distinguishing variation.

### 318 **3.7 Stages of color development**

319 A model of seed coat development has been formulated consisting of six stages based on  
320 the spread of pigmentation. In Stage 0, there is no color on the seed coat. In Stage 1, color  
321 appears at the base of the hilum. In Stage 2, color appears around the hilum. In Stage 3, color  
322 begins to spread along the outside edges of the seed. In Stage 4, color begins to fill in on the  
323 edges of the testa. In Stage 5, the color has completely developed to the mature level. After Stage  
324 5 the pod and seeds begin to desiccate. Of the observed varieties, only Sasaque and Sanzi  
325 completed all six stages. MAGIC059 reached Stage 4, while CB27 only reached Stage 2. No  
326 seeds in Stage 0 were observed for Sasaque. Images of each tested variety at various stages can  
327 be seen in Figure 3. Color development was associated with seed size; the pigmentation spread  
328 as the seeds grew larger.

## 329 4 Discussion

### 330 4.1 Segregation ratios and epistatic interaction of seed coat pattern loci

331 Segregation ratios and dominance data (Table 2, Figure 2) in the tested populations were  
332 consistent with a three gene system with simple dominance and epistatic interactions that  
333 matches the *C* (*Color Factor*), *W* (*Watson*), and one of the *H* (*Holstein*) factors identified by  
334 Spillman (1911) and Harland (1919). In brief, the *C* locus encodes a “constriction” factor while  
335 the *W* and *H* loci encode distinct “expansion” factors. The *C* locus is the primary locus  
336 controlling seed coat pattern. Pigmentation may be not visible (No Color,  $C_0$ ), constrained to an  
337 eye (Eye 1,  $C_1$ ), or distributed throughout the seed coat (Eye 2, Holstein, Watson, or Full Coat,  
338  $C_2$ ). The extent of distribution is modified by the *H* and *W* loci, whose contribution is visible  
339 only with an unconstrained allele ( $C_2$ ) at the *C* locus. In the presence of *Holstein* ( $H_1$ ) and  
340 absence of *Watson* ( $W_0$ ), a Holstein pattern is expressed. Conversely, in the presence of *Watson*  
341 ( $W_1$ ) and absence of *Holstein* ( $H_0$ ), a Watson pattern is expressed. In combination, the *Watson*  
342 ( $W_1$ ) and *Holstein* ( $H_1$ ) factors result in the Full Coat phenotype.

343 Based on the above proposed allelic series, an individual with the  $C_0C_0$  genotype will  
344 express the No Color pattern, regardless of the genotypes at the *W* and *H* loci, and an individual  
345 with the  $C_1C_1$  genotype will express the Eye 1 pattern, regardless of the genotypes at the *W* and  
346 *H* loci. However, when not constricted by a  $C_0$  or  $C_1$  allele (having the  $C_2$  allele) the “expansion”  
347 factors can be observed. An individual with the  $C_2--W_0W_0H_1--$  genotype expresses the Holstein  
348 pattern, while an individual with the  $C_2--W_1--H_0H_0$  genotype expresses the Watson pattern. An  
349 individual with the  $C_2--W_1--H_1--$  genotype, with both “expansion” factors, expresses the Full  
350 Coat pattern. An individual with the  $C_2--W_0W_0H_0H_0$  genotype expresses the Eye 2 pattern. In this  
351 latter case the eye pattern is observed despite the unconstricted  $C_2$  allele due to the absence of the  
352 “expansion” factors. Based on this model, the CB27 by BB and CB27 by 556 populations  
353 segregate at the *W* and *H* loci (Figure 2C), while the MAGIC, CB46 by 503, and 524B by 2049  
354 populations segregate at all three loci (Figure 2D). Similarly, the Tvu-15426 by MAGIC014  
355 populations segregate at the *W* locus (Figure 2E) and the CB27 by B21 and B21 by CB50  
356 populations segregate at the *C* locus (Figure 2F).

357 An additional pattern phenotype of Blue-grey Ring was noted in some of the tested  
358 populations. Blue-grey Ring consists of a pale ring of bluish-grey surrounding the eye (Figure 1).  
359 It appears only with the Eye 1 ( $C_1$ ) phenotype but is not always present when the phenotype is  
360 Eye 1 ( $C_1$ ). The Blue-grey Ring phenotype may represent another (fourth) allele at the *C* locus,  
361 or it may result from a combination of the  $C_1$  (Eye 1) allele and other pigmentation genes.  
362 However, from other unpublished work on seed coat color there does not appear to be a strict  
363 correlation between seed coat color and presence of the Blue-grey Ring. Further research is  
364 required to clarify the basis of the Blue-grey Ring phenotype.

### 365 4.2 Pattern traits QTL overlap

366 Several regions of the genome are hotspots for seed coat pattern traits (Supplementary  
367 Table 11). These correspond to locations of genetic factors identified by Spillman (1911) and  
368 Harland (1919), who identified four factors controlling seed coat patterning: *Color Factor* (*C*),  
369 *Watson* (*W*), *Holstein-1* (*H-1*), and *Holstein-2* (*H-2*). The present data suggest the presence of  
370 only one *Holstein* locus or that the two loci are very closely linked in the tested populations. To  
371 avoid possible confusion, the *Holstein* locus discussed here is simply termed “*H*.”

372 The major QTL and regions of interest for No Color and Eye 1 are clustered in an  
373 overlapping region on Vu07, suggesting that the “constriction” factor at locus *C* is at that  
374 position with allelism at the locus. Mapping results from the Tvu-15426 by MAGIC014 F2  
375 populations indicate that the *H* locus is on Vu10. Additional evidence for the *H* locus being  
376 located on Vu10 comes from Wu et al. (2019), who identified the *Anasazi* locus (equivalent to  
377 the cowpea *H* locus) on chromosome 10 of common bean, which is homologous to Vu10  
378 (Lonardi et al., 2019). While none of the biparental F2 populations segregated solely for the *W*  
379 locus, the identification of the *C* locus on Vu07 and the *H* locus on Vu10 must, by process of  
380 elimination, identify the location of the *W* “expansion” locus on Vu09.

### 381 **4.3 Seed coat pattern is due to failure to complete the normal color developmental** 382 **program**

383 It was noted that the varieties with the Full Coat pattern at maturity followed the  
384 developmental pattern described in Section 3.7 and shown in Figure 3 to completion. In contrast,  
385 varieties which do not display the Full Coat pattern appear to have color development arrested at  
386 certain points. This is most obvious in CB27 (Eye 2, *C*<sub>2</sub>), where color development proceeds  
387 only to Stage 2. It is likely that other varieties which have distinct eye sizes proceed to varied  
388 stages of development. For example, varieties with the No Color (*C*<sub>0</sub>) phenotype would not  
389 proceed past Stage 0. However, the three gene model presented here does not explain every seed  
390 coat pattern. An example is the pattern observed in mature Sanzi seed, which exhibits a Speckled  
391 black and purple seed coat (see Section 2.3 for a description and Figure 1). According to this  
392 analysis, Sanzi completes all six stages of seed coat development, indicating that the Speckled  
393 pattern is controlled separately. A biparental RIL population, consisting of lines derived from a  
394 cross between Sanzi and Vita 7, which has a brown Full Coat pattern (*C*<sub>2</sub>*C*<sub>2</sub>*W*<sub>1</sub>*W*<sub>1</sub>*H*<sub>1</sub>*H*<sub>1</sub>), was  
395 used for mapping the black seed coat color; there was a perfect correlation between black seed  
396 coat color and the Speckled pattern (Herniter et al., 2018). This indicates that genetic control of  
397 the Speckled pattern is colocalized with black seed coat color and may be an allele at the *Bl*  
398 locus, which is located on Vu05.

399 Further research is needed to determine if all cowpea accessions follow the pattern  
400 observed in the four tested lines shown in Figure 3. It may be that each of the observed stages of  
401 seed coat pigmentation development is controlled by a different gene, and that failures of normal  
402 gene function cause the observed variation in patterning. Evidence for this model is furnished by  
403 the noted developmental pattern of the seed coats where development appears to be arrested at

404 Stage 2 in CB27, which expresses the Eye 2 ( $C_2$ ) pattern, and at Stage 4 in MAGIC059, which  
405 expresses the Starry Night pattern (see Section 2.3 for a description and Figure 1). The  
406 mechanism by which this occurs is not elucidated here and requires further research.  
407 Transcriptome data could be gathered for the seed coat at each developmental stage. The  
408 currently available transcriptome data (Yao et al., 2016; legumeinfo.org) used whole seeds at  
409 specific days post flowering and do not distinguish between transcripts in the seed coat and those  
410 in the embryo or cotyledons, and further do not separate transcripts by developmental stage.

#### 411 **4.4 Candidate gene function**

412 The later steps in flavonoid biosynthesis are controlled by a transcription factor complex  
413 composed of an R2-R3 MYB protein, a basic helix-loop-helix protein (bHLH), and a WD-repeat  
414 protein (WD40; Xu et al., 2015). E3 Ubiquitin ligases (E3UL) are believed to negatively regulate  
415 this complex (Shin et al., 2015). The color and location (leaf, pod, seed coat) of the pigmentation  
416 are determined by expression patterns (Wu et al., 2003, Iorizzo, 2018). Candidate genes on Vu07  
417 ( $C$  locus) and Vu09 ( $W$  locus) encode a bHLH and WD40 protein, respectively. A candidate  
418 gene on Vu10 ( $H$  locus) encodes an E3UL protein. This information lends itself to a model in  
419 which *Vigun07g110700* (bHLH) serves as a “master switch” controlling the extent of  
420 pigmentation constriction while *Vigun09g139900* (WD40) and *Vigun10g163900* (E3UL) act as  
421 “modulating switches” controlling the type of expanded pattern, altering the effect of the  
422 pathway to result in the observed Holstein and Watson patterns (Figure 4). The R2-R3 MYB  
423 directs the DNA binding of the complex, with expression of different genes in different tissues  
424 resulting in the observed color and location of the pigments. For example, MYB genes identified  
425 by Herniter et al. (2018) are required for black seed coat and purple pod tip color. Further,  
426 *Vigun07g110700* (bHLH) was identified as a candidate gene controlling flower color in cowpea  
427 by Lo et al. (2018), indicating a possible dual function of the gene. Indeed, Harland (1919) noted  
428 that a lack of pigment in the flower was often associated with a lack of pigment in the seed coat.  
429 Finally, homologs of *Vigun07g110700* have been identified in other legumes as Mendel’s  $A$  gene  
430 controlling flower color in *Pisum sativum* (Hellens et al., 2010) and as the  $P$  gene in *Phaseolus*  
431 *vulgaris* (McClellan et al., 2018).

432 Two R2R3 MYB genes (*Vigun10g165300* and *Vigun10g165400*) are located only 110 kb  
433 downstream of *Vigun10g163900* ( $H$  locus candidate gene). However, these fall outside of the  
434 haplotype blocks identified in the CB27 by BB and CB27 by 556 populations, indicating that  
435 they are not the source of the observed phenotypic variation. However, there may be interaction  
436 between one or both of these MYBs and the E3UL responsible for the Holstein pattern; this  
437 hypothesis could be investigated through additional research.

438 The observed C/T SNP variation in the regulatory sequence of *Vigun07g110700* (bHLH)  
439 at 20,544,306 bp constitutes a difference between a WRKY binding site in the  $C_2$  (Eye 2) allele  
440 versus an ERF binding site in the  $C_1$  (Eye 1) allele. WRKY proteins are positive regulators of  
441 seed coat pigment biosynthesis in Arabidopsis (Lloyd et al., 2017) while ERF proteins negatively

442 regulate the same pathway (Matsui et al., 2008). This SNP could be used as a genetic marker to  
443 distinguish between the  $C_1$  and  $C_2$  alleles. The lack of correlation between an observed marker  
444 and the  $C_0$  (No Color) allele may be caused by other variants, such as a small deletion  
445 interrupting gene function, which has been shown in *Phaseolus vulgaris* (McClellan et al., 2018).  
446 Such a variation would not be detected by the genotyping platform used for this study. Similarly,  
447 the observed C/T SNP variation in the regulatory region of *Vigun09g139900* at 30,207,722 bp  
448 could be used as a marker to distinguish between the  $W_0$  (not Watson) and  $W_1$  (Watson) alleles,  
449 despite not necessarily being the cause of the observed phenotypic variation. No single variation  
450 was identified for *Vigun10g163900* alleles. However, haplotype blocks determined from the  
451 biparental RIL populations can be used for future breeding efforts. Two SNPs which fall within  
452 the genome sequence of *Vigun10g163900* segregate with the phenotype in the biparental RIL  
453 populations. At 2\_24359, the lines with the  $H_0$  (not Holstein) allele have an A genotype and the  
454 lines with the  $H_1$  (Holstein) allele have a G genotype. At 2\_24360, the lines with the  $H_0$  (not  
455 Holstein) allele have an A and the lines with the  $H_1$  (Holstein) allele have a C. Future research is  
456 needed to develop more perfect markers for the three loci.

## 457 **5 Abbreviations**

458 2049, IT84S-2049; 503, IT93K-503-1; 556, IT97K-556-6; B21, Bambe 21; BB, Big Buff  
459 (IT82E-18); bHLH, basic helix-loop-helix; *C*, *Color Factor*; CB27, California Blackeye 27;  
460 CB46, California Blackeye 46; CB50, California Blackeye 50; E3UL, E3 Ubiquitin ligase;  
461 GWA, Genome-Wide Association; *H*, *Holstein*; MAGIC, Multiparent Advanced Generation  
462 InterCross; QTL, quantitative trait locus; RIL, recombinant inbred line; SNP, single nucleotide  
463 polymorphism; UCR, University of California, Riverside; *W*, *Watson*; WD40, WD-repeat.

## 464 **6 Acknowledgements**

465 This manuscript has been released as a Pre-Print in bioRxiv (Herniter et al., 2019). The authors  
466 thank Amy Litt for helpful discussion and guidance on pattern development; Eric Castillo and  
467 Sabrina Phengsy for assistance with seed photography; Steve Wanamaker for assistance in the  
468 analysis of the various genome sequences. This study was supported by the Feed the Future  
469 Innovation Lab for Climate Resilient Cowpea (USAID Cooperative Agreement AID-OAA-A-  
470 13-00070), the National Science Foundation BREAD project “Advancing the Cowpea Genome  
471 for Food Security” (NSF IOS-1543963) and Hatch Project CA-R-BPS-5306-H.

## 472 **7 Author Contributions Statement**

473 I.H. performed all trait mapping, statistical analysis, and interpretation. R.L. performed analysis  
474 of the seed coat development. M.M. assisted in trait mapping and provided SNP data. Sa.L.  
475 assisted in trait mapping. Y.G. extracted DNA for genotyping. B.H. provided the MAGIC  
476 population and its genotypic information. M.L. performed crosses used for allelic series analysis.  
477 Z.J. assisted in statistical analysis. P.R. and T.C. provided guidance and access to population and

478 genetic resources. St.L. assisted with the SNP selection panel data. T.C. assisted I.H. with the  
479 writing.

480 *The authors declare that the research was conducted in the absence of any commercial or*  
481 *financial relationships that could be construed as a potential conflict of interest.*

## 482 **8 Contribution to the Field**

483 Seed coat pattern is an important consumer-related trait. Consumers make decisions about the  
484 quality, value, and use of products based on visual traits. As such, it is important for breeders to  
485 understand the genetic bases of these traits to facilitate efforts to produce improved varieties that  
486 meet market preferences. Previous research, dating back to the early twentieth century, first  
487 reported genetic factors controlling cowpea seed coat pattern. With access to new resources,  
488 including genome sequences, mapping populations, and advanced genetic markers, here we  
489 clarify the inheritance of and interactions between major loci controlling seed coat patterns.  
490 Specifically, this includes three candidate genes for control of seed coat pattern and possible  
491 genetic markers that can be used for breeding purposes. In addition, we propose a model of seed  
492 coat development to explain much of the observed variation. Our findings advance the  
493 understanding of the genetic control of seed coat pattern in cowpea and provide actionable  
494 results that can be applied in breeding programs.

## 495 **9 Data Availability Statement**

496 All datasets [SNPs] for this study are included in the manuscript and the supplementary files.

497

498 Table 1. Parental phenotypes and expected genotypes of the examined populations.

| Population            | Population type | Parent                 | Phenotype | Proposed Genotype    |
|-----------------------|-----------------|------------------------|-----------|----------------------|
| MAGIC                 | 8-Parent RIL    | California Blackeye 27 | Eye 2     | $C_2C_2W_0W_0H_0H_0$ |
|                       |                 | IT00K-1263             | Full Coat | $C_2C_2W_1W_1H_1H_1$ |
|                       |                 | IT82E-18               | Full Coat | $C_2C_2W_1W_1H_1H_1$ |
|                       |                 | IT84S-2049             | Eye 1     | $C_1C_1W_1W_1H_1H_1$ |
|                       |                 | IT84S-2246             | Full Coat | $C_2C_2W_1W_1H_1H_1$ |
|                       |                 | IT89KD-288             | Eye 1     | $C_1C_1W_1W_1H_1H_1$ |
|                       |                 | IT93K-503-1            | Eye 1     | $C_1C_1W_1W_1H_1H_1$ |
|                       |                 | SuVita 2               | Full Coat | $C_2C_2W_1W_1H_1H_1$ |
| CB27 by BB            | Biparental RIL  | California Blackeye 27 | Eye 2     | $C_2C_2W_0W_0H_0H_0$ |
|                       |                 | IT82E-18               | Full Coat | $C_2C_2W_1W_1H_1H_1$ |
| CB27 by 556           | Biparental RIL  | California Blackeye 27 | Eye 2     | $C_2C_2W_0W_0H_0H_0$ |
|                       |                 | IT97K-556-6            | Full Coat | $C_2C_2W_1W_1H_1H_1$ |
| CB46 by 503           | Biparental RIL  | California Blackeye 46 | Eye 2     | $C_2C_2W_0W_0H_0H_0$ |
|                       |                 | IT93K-503-1            | Eye 1     | $C_1C_1W_1W_1H_1H_1$ |
| 524B by 2049          | Biparental RIL  | 524B                   | Eye 2     | $C_2C_2W_0W_0H_0H_0$ |
|                       |                 | IT84S-2049             | Eye 1     | $C_1C_1W_1W_1H_1H_1$ |
| CB27 by B21           | F2              | California Blackeye 27 | Eye 2     | $C_2C_2W_0W_0H_0H_0$ |
|                       |                 | Bambey 21              | No Color  | $C_0C_0W_0W_0H_0H_0$ |
| B21 by CB50           | F2              | Bambey 21              | No Color  | $C_0C_0W_0W_0H_0H_0$ |
|                       |                 | California Blackeye 50 | Eye 2     | $C_2C_2W_0W_0H_0H_0$ |
| Tvu-15426 by MAGIC014 | F2              | Tvu-15426              | Full Coat | $C_2C_2W_1W_1H_1H_1$ |
|                       |                 | MAGIC014               | Watson    | $C_2C_2W_1W_1H_0H_0$ |

499

500

501 Table 2. Phenotypes, segregation ratios, and probability values for the tested populations.

| Population<br>(# of lines)             | Eye 1 | Eye 2 | Holstein | Watson | Full<br>Coat | No<br>Color | Pred. Seg. Ratio | X <sup>2</sup> | Probability |
|----------------------------------------|-------|-------|----------|--------|--------------|-------------|------------------|----------------|-------------|
| MAGIC<br>(305)                         | 121   | 0     | 21       | 13     | 141          | --          | 192:5:35:35:245  | 6.41           | 0.17        |
| CB27 by<br>Big Buff<br>(87)            | --    | 20    | 28       | 16     | 23           | --          | 1:1:1:1          | 3.53           | 0.32        |
| CB27 by<br>556 (80)                    | --    | 14    | 30       | 17     | 19           | --          | 1:1:1:1          | 7.30           | 0.06        |
| CB46 by<br>503 (101)                   | 49    | 12    | 17       | 8      | 15           | --          | 4:1:1:1:1        | 3.73           | 0.44        |
| 524B by<br>2049 (76)                   | 47    | 5     | 8        | 6      | 10           | --          | 4:1:1:1:1        | 5.82           | 0.21        |
| CB27 by<br>B21 A<br>(176)              | --    | 129   | --       | --     | --           | 47          | 3:1              | 0.27           | 0.60        |
| CB27 by<br>B21 B<br>(132)              | --    | 88    | --       | --     | --           | 44          | 3:1              | 4.89           | 0.027       |
| B21 by<br>CB50 (143)                   | --    | 112   | --       | --     | --           | 31          | 3:1              | 0.84           | 0.36        |
| Tvu-15426<br>by<br>MAGIC014<br>A (175) | --    | --    | --       | 44     | 131          | --          | 1:3              | 0.0019         | 0.97        |
| Tvu-15426<br>by<br>MAGIC014<br>B (120) | --    | --    | --       | 27     | 93           | --          | 1:3              | 0.40           | 0.53        |

502

503



504

## REFERENCES

- 505 Broman, K.W., H. Wu, S. Sen, and G.A. Churchill. 2003. R/qtl: QTL mapping in experimental  
506 crosses. *Bioinformatics*. 19 (7):889-890 doi:10.1093/bioinformatics/btg112
- 507 Boukar, O., N. Belko, S. Chamarthi, A. Togola, J. Batiemo, E. Owusu, M. Haruna, S. Diallo,  
508 M.L. Umar, O. Olufajo, and C. Fatokun. 2018. Cowpea (*Vigna unguiculata*): genetics,  
509 genomics and breeding. *P. Breed.* doi: 10.1111/pbr.12589
- 510 Drabo, I., Ladieinde, T.A.O., Smithson, J.B., and R. Redden. 1988. Inheritance of eye pattern  
511 and seed coat colour in cowpea (*Vigna unguiculata* [L.] Walp.). *Plant Breed.* 100 (2):  
512 119-123 doi: 10.1111/j.1439-0523.1988.tb00226.x
- 513 Ehlers, J.D., and A.E. Hall. 1997. Cowpea (*Vigna unguiculata* L. Walp.). *Field Crops Res.* 53  
514 (1-3):187-204. doi: 10.1016/S0378-4290(97)00031-2
- 515 FAOSTAT. 2019. "Crops." <http://www.fao.org/faostat/en/#data/QC>.
- 516 Fery, R.L. 1980. Genetics of *Vigna*. In: *Horticultural Reviews*, 2:311-94. Hoboken, NJ, USA:  
517 John Wiley & Sons, Inc. doi: 10.1002/9781118060759.ch7
- 518 Fery, R.L. 1985. Improved cowpea cultivars for the horticultural industry in the USA. In: S.R.  
519 Singh and K.O. Rachie, editors, *Cowpea Research, Production and Utilization*. John  
520 Wiley & Sons, Inc. p. 129-35.
- 521 Harland, S.C. 1919. Inheritance of certain characters in the cowpea (*Vigna sinensis*). *J. Genet.* 8  
522 (2):101-32. doi: 10.1007/BF02983490
- 523 Harland, S.C. 1920. Inheritance of Certain Characters in the Cowpea (*Vigna sinensis*). II. *J.*  
524 *Genet.* 10 (3):193-205. doi: 10.1007/BF03007981
- 525 Hellens, R.P., C. Moreau, K. Lin-Wang, K.E. Schwinn, S.J. Thomson, M.W.E.J. Fiers, T.J.  
526 Frew, et al. 2010. "Identification of Mendel's White Flower Character." *PLoS ONE*  
527 5(10). doi: 10.1371/journal.pone.0013230
- 528 Herniter, I.A., M. Muñoz-Amatriaín, S. Lo, Y.-N. Guo, and T.J. Close. 2018. Identification of  
529 candidate genes controlling black seed coat and pod tip color in cowpea (*Vigna*  
530 *unguiculata* [L.] Walp). *G3* 8(10):3347-55. doi: 10.1534/g3.118.200521
- 531 Herniter, I.A., R. Lo, M. Muñoz-Amatriaín, S. Lo, Y.-N. Guo, B.-L. Huynh, M. Lucas, Z. Jia,  
532 P.A. Roberts, and T.J. Close. 2019. Identification of seed coat pattern trait QTL and a  
533 description of seed coat development in cowpea (*Vigna unguiculata* [L.] Walp.). *bioRxiv*  
534 [Preprint]. Available at: <https://doi.org/10.1101/514455> (Accessed March 26, 2019).
- 535 Herniter, I.A., Z. Jia, and F. Kusi. 2019. Market preferences for cowpea (*Vigna unguiculata* [L.]  
536 Walp) dry grain in Ghana. *African J. Ag. Res.* 14(22):928-934 doi:  
537 10.5897/AJAR2019.13997

- 538 Huang, B.E., and A.W. George. 2011. R/mpMap: a computational platform for the genetic  
539 analysis of multiparent recombinant inbred lines. *Bioinformatics* 27 (5):727–29. doi:  
540 10.1093/bioinformatics/btq719
- 541 Huynh, B.-L., J.D. Ehlers, B.E. Huang, M. Muñoz-Amatriaín, S. Lonardi, J.R.P. Santos, A.  
542 Ndeve, et al. 2018. A Multi-Parent Advanced Generation Inter-Cross (MAGIC)  
543 population for genetic analysis and improvement of cowpea (*Vigna unguiculata* L.  
544 Walp.). *Plant J.* 93 (6):1129–42. doi: 10.1111/tpj.13827
- 545 Huynh, B.-L., J.D. Ehlers, A. Ndeve, S. Wanamaker, M.R. Lucas, T.J. Close, and P.A. Roberts.  
546 2015. Genetic mapping and legume synteny of aphid resistance in African cowpea (*Vigna*  
547 *unguiculata* L. Walp.) grown in California. *Mol. Breeding* 35 (1):36. doi:  
548 10.1007/s11032-015-0254-0
- 549 Iorizzo, M., P.F. Cavagnaro, H. Bostan, Y. Zhao, J. Zhang, and P.W. Simon. 2018. A cluster of  
550 *MYB* transcription factors regulates anthocyanin biosynthesis in carrot (*Daucus carota*  
551 L.) root and petiole. *Front. Plant Sci.* 9:1927 doi: 10.3389/fpls.2018.01927
- 552 Jaeger, S.R., L. Antúnez, G. Ares, M. Swaney-Stueve, D. Jin, and F.R. Harker. 2018. Quality  
553 perceptions regarding external appearance of apples: insights from experts and consumers  
554 in four countries. *Postharvest Bio. and Tech.* 146 (December):99–107. doi:  
555 10.1016/J.POSTHARVBIO.2018.08.014
- 556 Jin, J., F. Tian, D.-C. Yang, Y.-Q. Meng, L. Kong, J. Luo, and G. Gao. 2017. PlantTFDB 4.0:  
557 toward a central hub for transcription factors and regulatory interactions in plants.  
558 *Nucleic Acids Res.* 45 (D1):D1040–45. doi: 10.1093/nar/gkw982
- 559 Kostyla, A.S., F.M. Clydesdale, and M.R. McDaniel. 1978. The psychophysical relationships  
560 between color and flavor. *Food Sci. and Nut.* 10 (3):303–21. doi:  
561 10.1080/10408397809527253
- 562 Langyintuo, A.S., G. Ntougam, L. Murdock, J. Lowenberg-DeBoer, and D.J. Miller. 2004.  
563 Consumer preferences for cowpea in Cameroon and Ghana. *Agric. Econ.* 30 (3):203–13.  
564 doi: 10.1111/j.1574-0862.2004.tb00189.x
- 565 Lloyd, A., A. Brockman, L. Aguirre, A. Campbell, A. Bean, A. Cantero, and A. Gonzalez. 2017.  
566 Advances in the MYB–bHLH–WD repeat (MBW) pigment regulatory model: addition of  
567 a WRKY factor and co-option of an anthocyanin MYB for betalain regulation. *Plant and*  
568 *Cell Physiol.* 58 (9):1431–41. doi: 10.1093/pcp/pcx075
- 569 Lonardi, S., M. Muñoz-Amatriaín, Q. Liang, S. Shu, S.I. Wanamaker, S.Lo, J. Tanskanen, et al.  
570 2019. The genome of cowpea (*Vigna unguiculata* [L.] Walp.). *Plant J.* 98 (5):767–782.  
571 doi: 10.1111/tpj.14349

- 572 Lucas, M.R., N.N. Diop, and S. Wanamaker. 2011. Cowpea–soybean synteny clarified through  
573 an improved genetic map. *The Plant Genome* 4 (3):218–25. doi:  
574 10.3835/plantgenome2011.06.0019
- 575 Matsui, K., Y. Umemura, and M. Ohme-Takagi. 2008. AtMYBL2, a protein with a single MYB  
576 domain, acts as a negative regulator of anthocyanin biosynthesis in *Arabidopsis*. *Plant J.*  
577 55 (6):954–67. doi: 10.1111/j.1365-313X.2008.03565.x
- 578 McClean, P.E., K.E. Bett, R. Stonehouse, R. Lee, S. Pflieger, S.M. Moghaddam, V. Geffroy, et  
579 al. 2018. White seed color in common bean (*Phaseolus vulgaris*) results from convergent  
580 evolution in the *P (pigment)* gene. *New Phytologist*. 219(3):1112-1123 doi:  
581 10.1111/nph.15259
- 582 Menéndez, C.M., A.E. Hall, and P. Gepts. 1997. A genetic linkage map of cowpea (*Vigna*  
583 *unguiculata*) developed from a cross between two inbred, domesticated lines. *Theor.*  
584 *Appl. Genet.* 95 (8):1210–17. doi: 10.1007/s001220050683
- 585 Mishili, F.J., J. Fulton, M. Shehu, S. Kushwaha, K. Marfo, M. Jamal, A. Kergna, and J.  
586 Lowenberg-DeBoer. 2009. Consumer preferences for quality characteristics along the  
587 cowpea value chain in Nigeria, Ghana, and Mali. *Agribusiness* 25 (1):16–35. doi:  
588 10.1002/agr.20184
- 589 Muchero, W., N.N. Diop, P.R. Bhat, R.D. Fenton, S. Wanamaker, M. Pottorff, S. Hearne, et al.  
590 2009. A consensus genetic map of cowpea [*Vigna unguiculata* (L) Walp.] and Synteny  
591 Based on EST-Derived SNPs. *PNAS* 106 (43):18159–64. doi: 10.1073/pnas.0905886106
- 592 Muñoz-Amatriaín, M., S. Lonardi, Q. Liang, S. Shu, S.I. Wanamaker, S. Lo, H. Alan, et al. 2019.  
593 Genome Resources for Cowpea (*Vigna unguiculata* [L.] Walp). Poster session presented  
594 at: Plant and Animal Genome Conference; 2019 Jan 11-16. San Diego, California.
- 595 Muñoz-Amatriaín, M., H. Mirebrahim, P. Xu, S.I. Wanamaker, M.C. Luo, H. Alhakami, M.  
596 Alpert, et al. 2017. Genome resources for climate-resilient cowpea, an essential crop for  
597 food security. *Plant J.* 89 (5):1042–54. doi: 10.1111/tpj.13404
- 598 Pottorff, M., P.A. Roberts, T.J. Close, S. Lonardi, S. Wanamaker, and J.D. Ehlers. 2014.  
599 Identification of candidate genes and molecular markers for heat-induced brown  
600 discoloration of seed coats in cowpea [*Vigna unguiculata* (L.) Walp]. *BMC Genomics* 15  
601 (1):328. doi: 10.1186/1471-2164-15-328
- 602 Santos, J.R.P., A.D. Ndeve, B.-L. Huynh, W.C. Matthews, P.A. Roberts. 2018. QTL mapping  
603 and transcriptome analysis of cowpea reveals candidate genes for root-knot nematode  
604 resistance. *PLoS One*. 13(1):1-22. doi: 10.1371/journal.pone.0189185
- 605 Saunders, A.R. 1960. Inheritance in the cowpea (*Vigna sinensis* Endb.). II: seed coat colour  
606 pattern; flower, plant, and pod color. *S. African J. Agric. Sci.* 3 (2):141-162.

- 607 Shin, D.H., M. Cho, M.G. Choi, P.K. Das, S.-K. Lee, S.-B. Choi, and Y.-Il Park. 2015.  
608 Identification of genes that may regulate the expression of the transcription factor  
609 production of anthocyanin pigment 1 (PAP1)/MYB75 involved in Arabidopsis  
610 anthocyanin biosynthesis. *Plant Cell Rep.* 34 (5):805–15. doi: 10.1007/s00299-015-1743-  
611 7
- 612 Singh, B.B. 2014. Cowpea: the food legume of the 21st century. Crop Science Society of  
613 America, Inc. doi: 10.2135/2014
- 614 Spillman, W.J. 1911. Inheritance of the ‘eye’ in *Vigna*. *The American Naturalist XLV* (53):513–  
615 23
- 616 Spillman, W.J. and W.J. Sando. 1930. Mendelian factors in the cowpea (*Vigna* species). *Mich.*  
617 *Acad. Sci. Arts Letters.* 11: 249-283
- 618 Tierney, L., A.J. Rossini, N. Li, H. Sevcikova. 2015. snow: simple network of workstations.  
619 <https://cran.r-project.org/package=snow>
- 620 Tijjani, A.R., R.T. Nabinta, and M. Muntaka. 2015. Adoption of innovative cowpea production  
621 practices in a rural area of Katsina State, Nigeria. *J. Agric. and Crop Res.* 3 (June):53–58.
- 622 Wu, D., J. Hought, M. Baseggio, J.P. Hart, M.A. Gore, and D.C. Ilut. 2019. “Genomic  
623 Characterization of the Native Seeds/SEARCH Common Bean (*Phaseolus Vulgaris* L.)  
624 Collection and Its Seed Coat Patterns.” *Gen. Res. and Crop Evo.* doi: 10.1007/s10722-  
625 019-00823-4
- 626 Wu, X.-M., S.-H. Lim, and W.-C. Yang. 2003. Characterization, expression and phylogenetic  
627 study of *R2R3-MYB* genes in orchid. *P. Mol. Bio.* 51(6):959-972 doi:  
628 10.1023/A:1023050110077
- 629 Wu, Y., P.R. Bhat, T.J. Close, and S. Lonardi. 2008. Efficient and accurate construction of  
630 genetic linkage maps from the minimum spanning tree of a graph. *PLoS Genet.*  
631 4(10):e1000212. doi: 10.1371/journal.pgen.1000212
- 632 Xu, W., C. Dubos, and L. Lepiniec. 2015. Transcriptional control of flavonoid biosynthesis by  
633 MYB–bHLH–WDR complexes. *Trends in Plant Sci.* 20 (3):176–85. doi:  
634 10.1016/J.TPLANTS.2014.12.001
- 635 Yao, S., C. Jiang, Z. Huang, I. Torres-Jerez, J. Chang, H. Zhang, M. Udvardi, R. Liu, and J.  
636 Verdier. 2016. The *Vigna unguiculata* Gene Expression Atlas (VuGEA) from de novo  
637 assembly and quantification of RNA-seq data provides insights into seed maturation  
638 mechanisms. *Plant J.* 88 (2):318–27. doi: 10.1111/tpj.13279
- 639 Zhang, Z., E. Ersoz, C.-Q. Lai, R. J. Todhunter, H.K. Tiwari, M.A. Gore, P.J. Bradbury, et al.  
640 2010. Mixed linear model approach adapted for genome-wide association studies. *Nat.*  
641 *Genet.* 42 (4):355–60. doi: 10.1038/ng.546

642 **Figure 1.** Seed coat pattern traits. Images of lines from various populations demonstrating the  
643 phenotypes which were scored as part of this study.

644 **Figure 2.** Interaction of seed coat pattern loci. (A) Table displaying the pattern loci identified in  
645 mapping, their locations, the trait encoded, alleles identified, and phenotypes. (B) Table  
646 displaying the allelic series and relative dominance of alleles. (C) Segregation patterns for the  
647 CB27 by BB and CB27 by 556 F8 populations. (D) Segregation patterns for the CB46 by 503  
648 and 524B by 2049 F8 populations. (E) Segregation pattern for the Tvu-15426 by MAGIC014 F2  
649 populations. (F) Segregation pattern for the CB27 by B21 and B21 by CB50 F2 populations. (G)  
650 Phenotype of seeds from the F1 plants resulting from a series of crosses (i) Cross between CB27  
651 and line from the CB27 by BB population with a Watson pattern, resulting in Watson pattern. (ii)  
652 Cross between CB27 and a line from the CB27 by BB population a Holstein pattern, resulting in  
653 Holstein pattern. (iii) Cross between CB27 and a line from the CB27 by BB population with a  
654 Full Coat pattern, resulting in a Full Coat pattern. (iv) Cross between IT84S-2246 and IT93K-  
655 503-1 from the early development of the MAGIC population, resulting in a Full Coat pattern in  
656 the seed coats on seeds of the F1 maternal parent.

657 **Figure 3.** Seed coat color development. Images showing the development the seed and the  
658 spread of pigmentation.

659 **Figure 4.** Proposed roles of the *C*, *W*, and *H* genes. Transcription of flavonoid biosynthesis  
660 pathway genes are controlled by a complex composed of three types of proteins (Xu et al., 2015),  
661 a basic helix-loop-helix protein (bHLH; e.g., *Vigun07g110700*, *C* locus), a WD-repeat protein  
662 (WD40; e.g., *Vigun09g139900*, *W* locus), and an R2R3 MYB transcription factor. This complex  
663 is in turn negatively regulated by an E3 Ubiquitin ligase (E3UL; e.g., *Vigun10g163900*, *H* locus).  
664 Sequence comparisons suggest that bHLH transcription may be controlled by ERF and WRKY  
665 proteins. The observed seed coat pattern phenotypes are a result of different alleles and  
666 expression patterns.

667

668 Supplementary Figure 1. Relative expression levels of the candidate genes. TPM, Transcripts per  
669 million; dap, days after pollination. Data retrieved from legumeinfo.org.

670

No Color

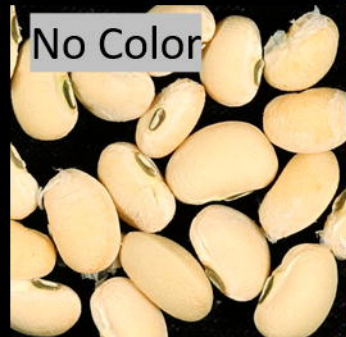

Eye 1

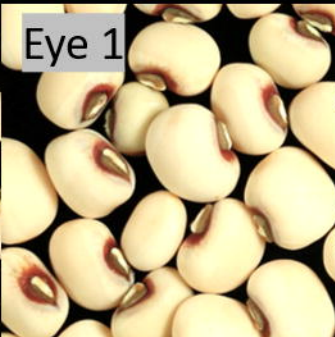

Eye 2

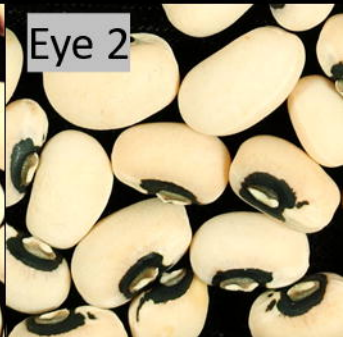

Holstein

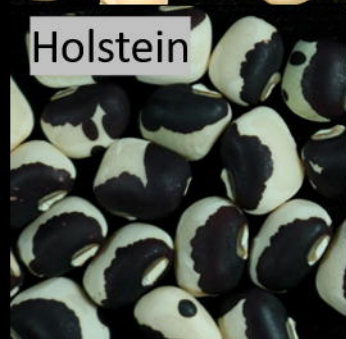

Watson

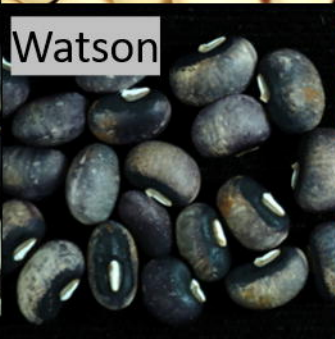

Full Coat

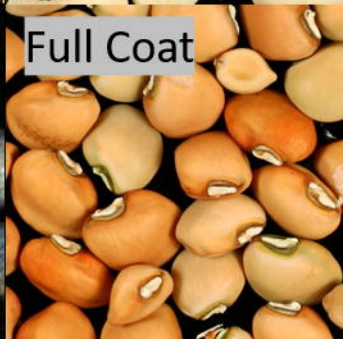

Blue-grey Ring

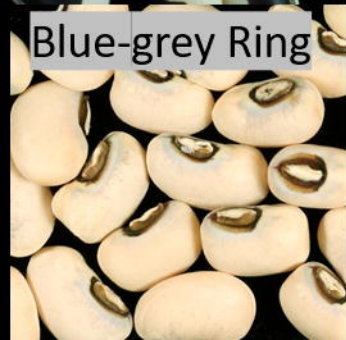

Speckled

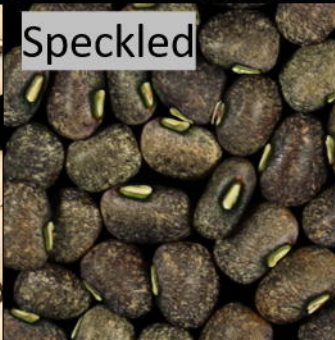

Starry Night

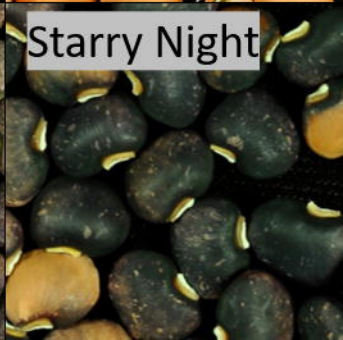

A.

| Location | Locus | Trait        | Alleles | Phenotype                     |
|----------|-------|--------------|---------|-------------------------------|
| Vu07     | C     | Color factor | $C_0$   | No Color                      |
|          |       |              | $C_1$   | Eye 1<br>(Constricted to eye) |
|          |       |              | $C_2$   | Eye 2<br>(Unconstricted)      |
| Vu09     | W     | Watson       | $W_1$   | Watson                        |
|          |       |              | $W_0$   | Null                          |
| Vu10     | H     | Holstein     | $H_1$   | Holstein                      |
|          |       |              | $H_0$   | Null                          |

B.

| Location | Locus | Allelic Series         |
|----------|-------|------------------------|
| Vu07     | C     | $C_2 > C_0, C_2 > C_1$ |
| Vu09     | W     | $W_1 > W_0$            |
| Vu10     | H     | $H_1 > H_0$            |

C.

bioRxiv preprint doi: <https://doi.org/10.1101/514455>; this version posted September 20, 2019. The copyright holder for this preprint (which was not certified by peer review) is the author/funder. All rights reserved. No reuse allowed without permission.

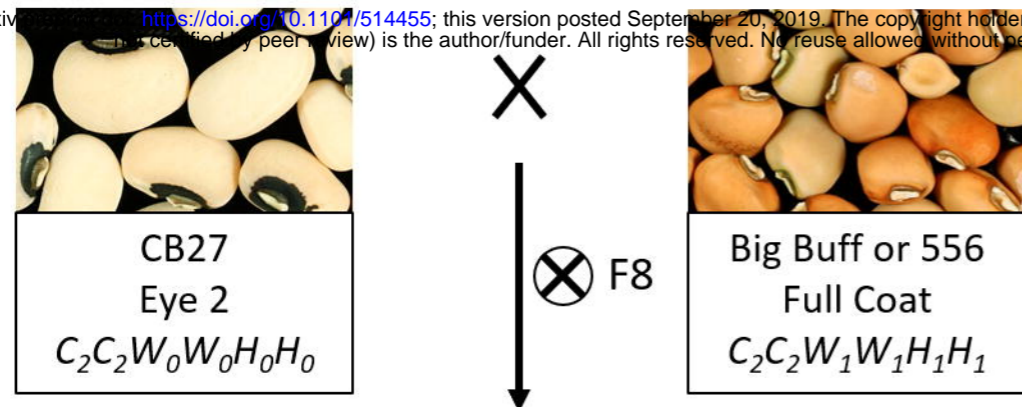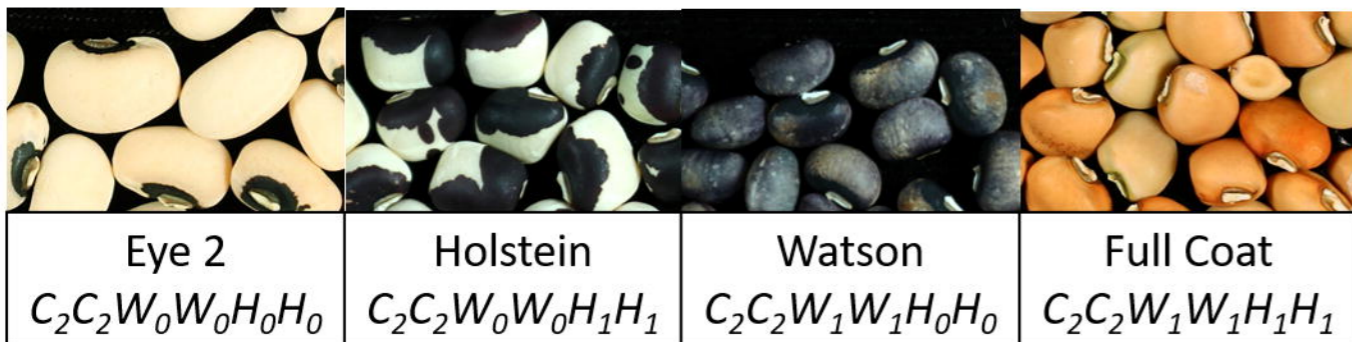

D.

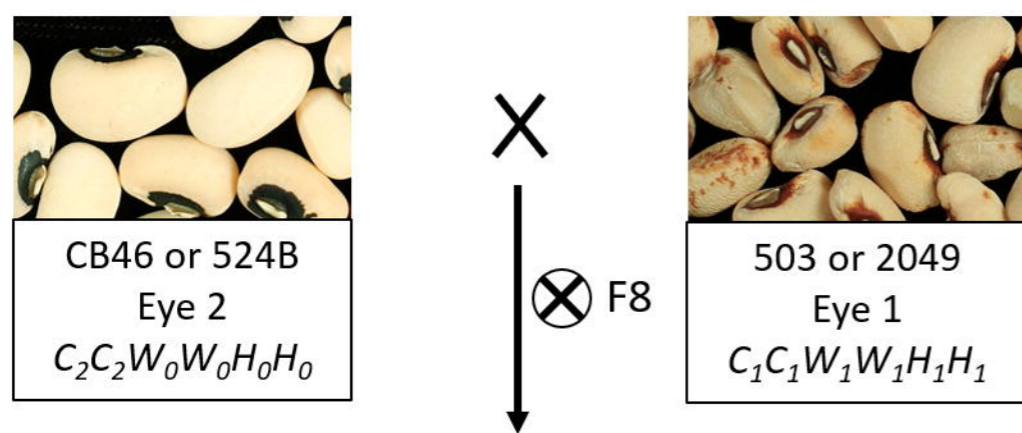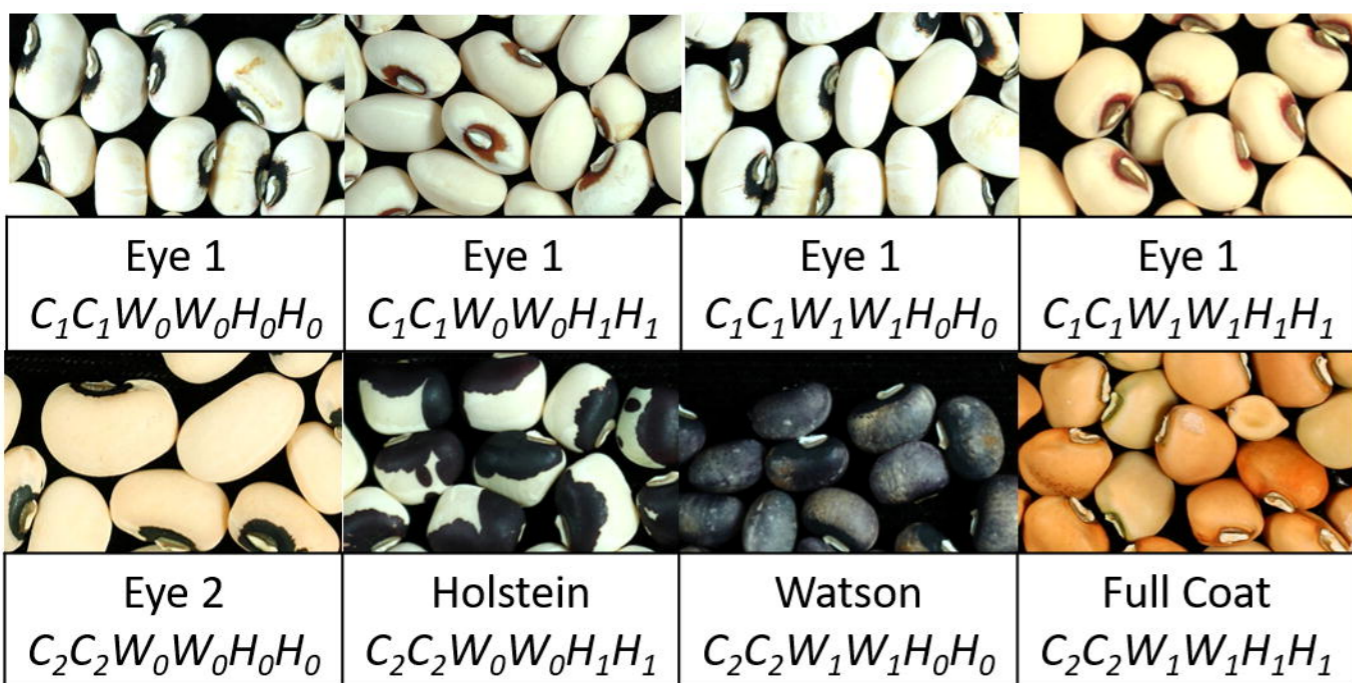

E.

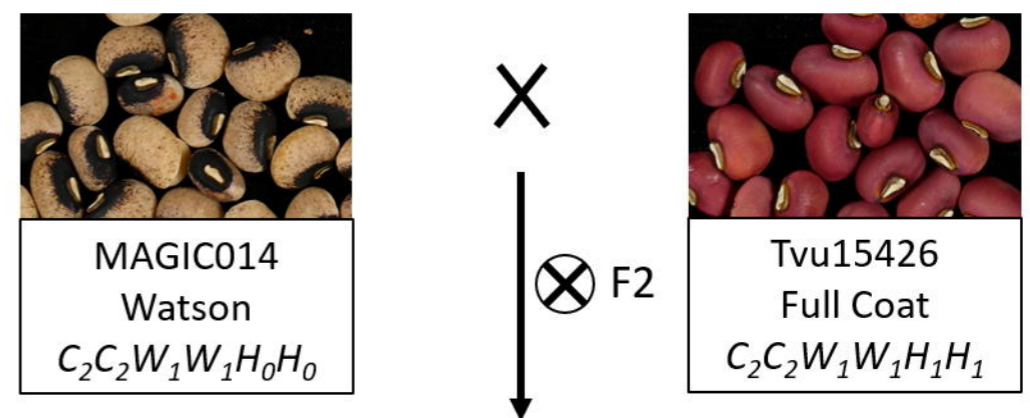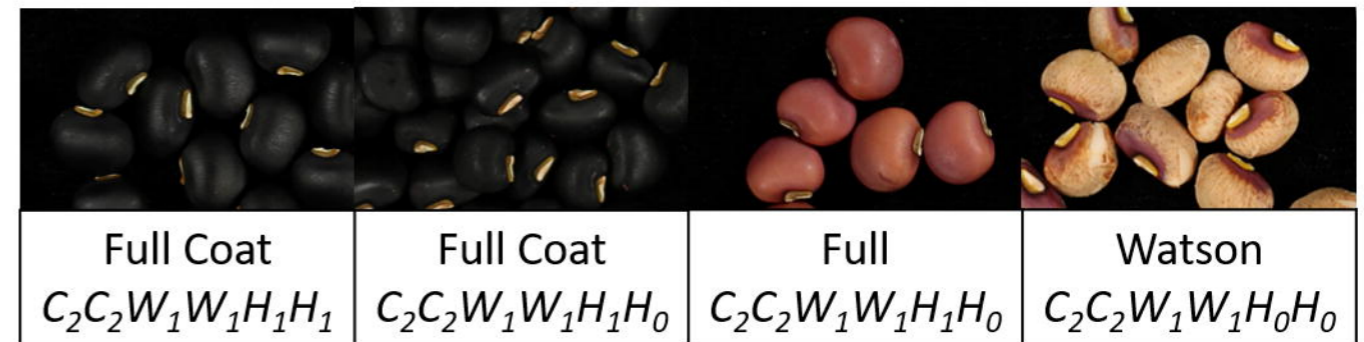

F.

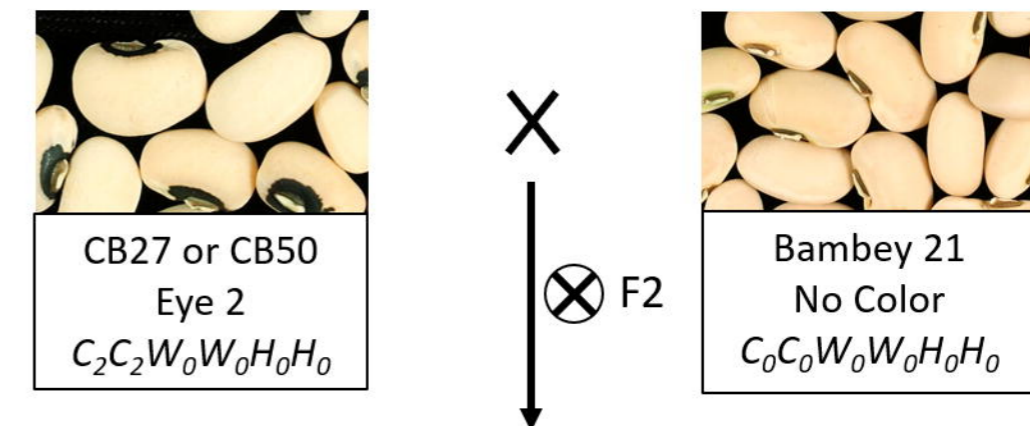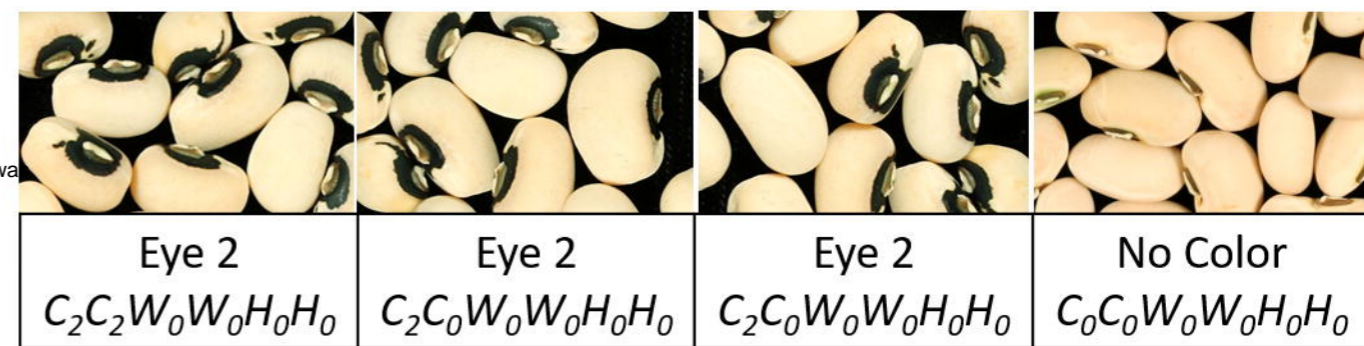

G.

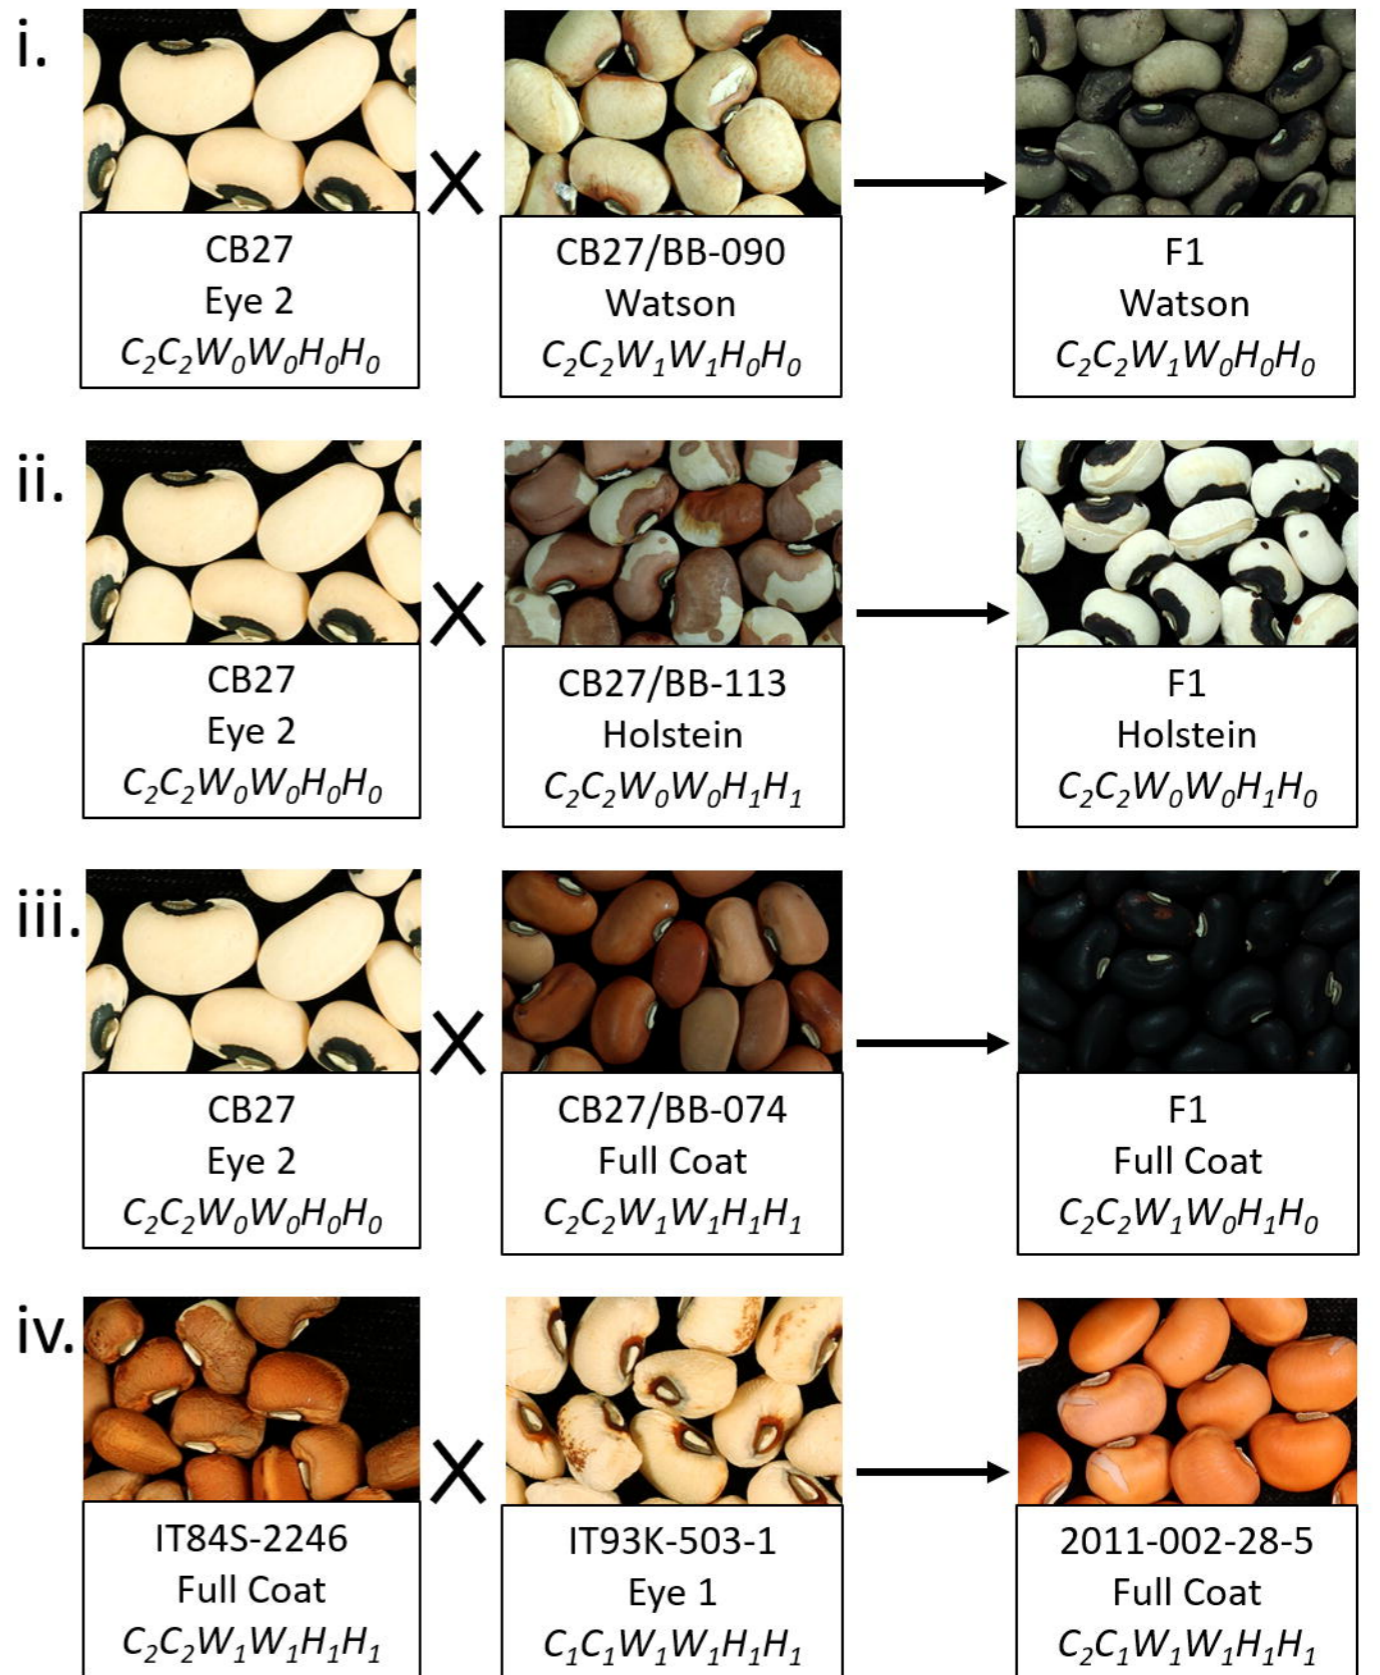

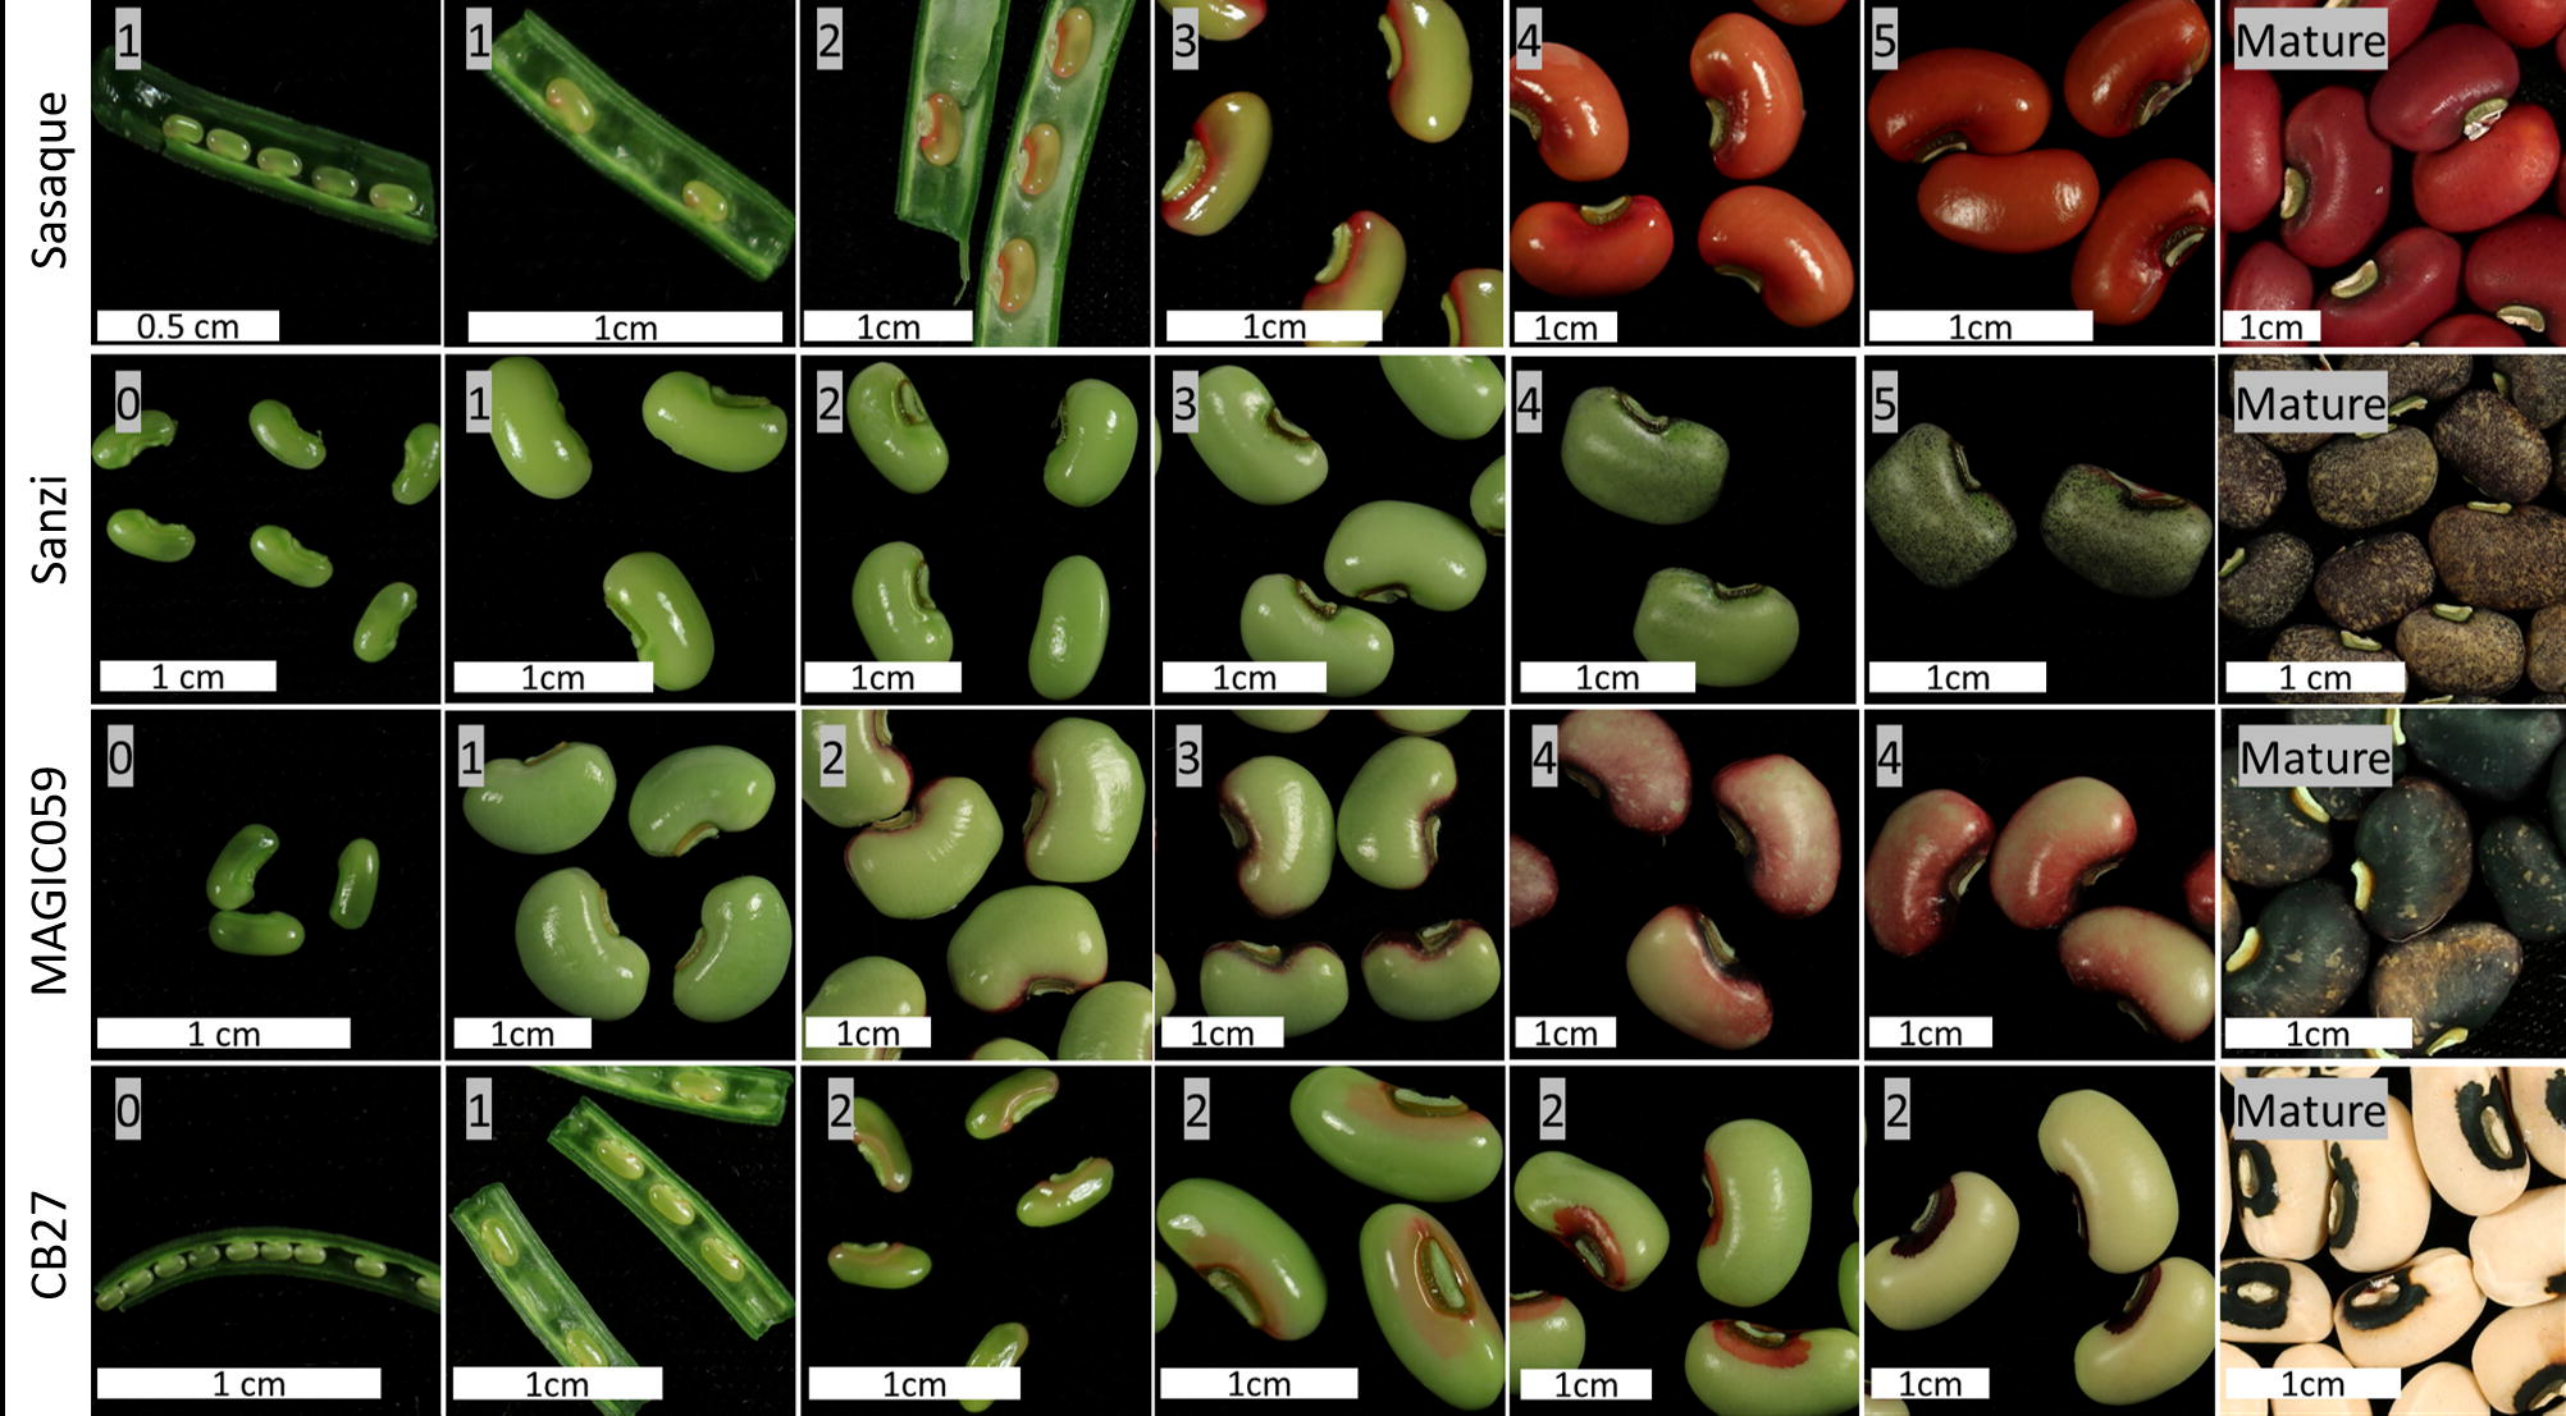



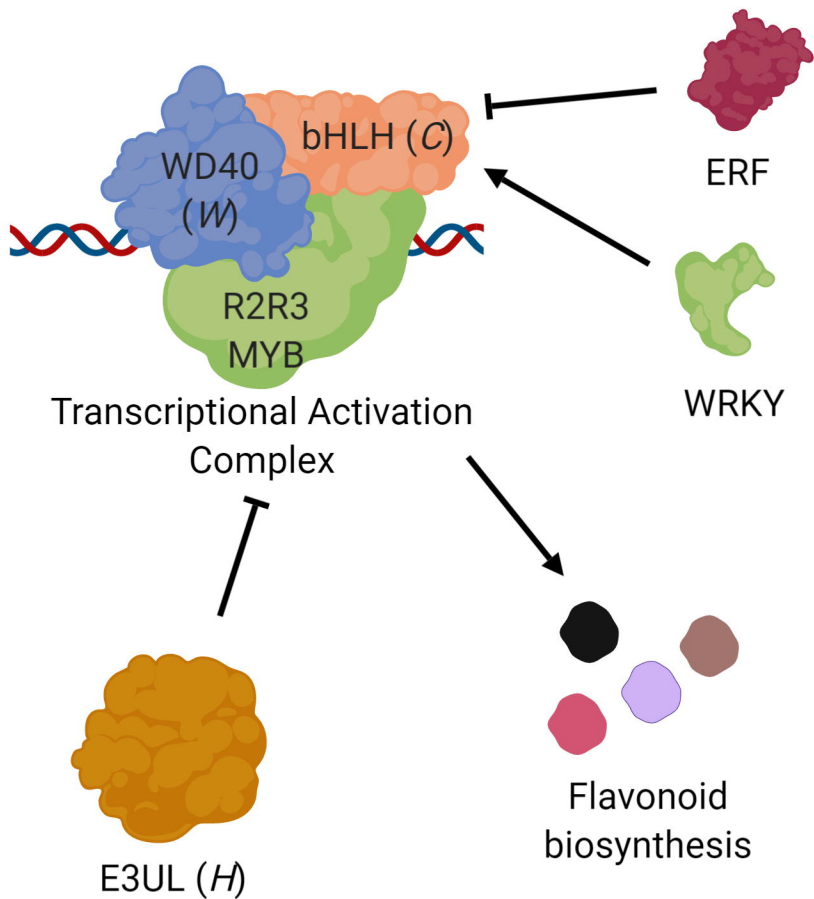

Source: https://www.biorxiv.org/content/biorxiv/early/2019/09/20/514455.full.pdf
